# Supplementary material
Source: PubMed Central journal article supplement (PMC3150972)
Supplement: nen0094-0049-s01.pdf [file nen0094-0049-s01.pdf]

## Supplementary Figure 1

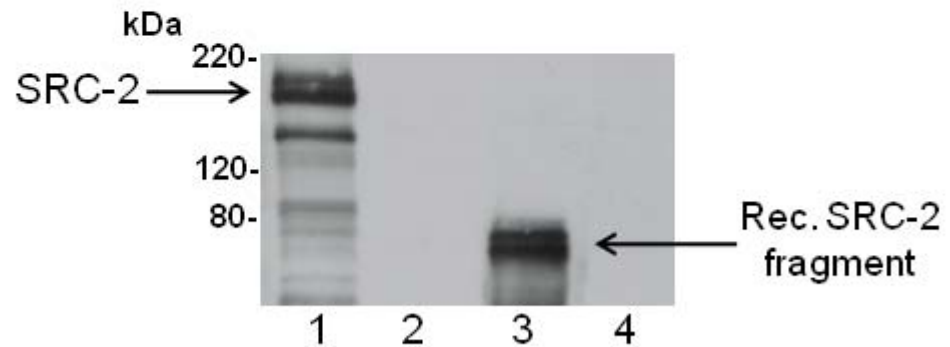

Supplementary figure 1. SRC-2 is expressed in female mouse hypothalamus. Western blot analysis shows that the SRC-2 antibody (NB100--1756) recognizes an SRC-2 immunoreactive band at the expected molecular mass of 160 kDa from homogenates of female mouse hypothalamus (lane 1) and a positive control of GST-tagged fragment of recombinant human SRC-2 (aa 1365--1465) at the expected molecular mass of ~40 kDa (lane 3), but does not recognize the negative controls of recombinant full length SRC-1 (lane 3) or SRC-3 (lane 4).
